# Supplementary material for: A multi-scale cardiovascular system model can account for the load-dependence of the end-systolic pressure-volume relationship
Source: PubMed Central journal article supplement (PMC3610305; doi:10.1186/1475-925x-12-8), 2013-01-30
Supplement: 1475-925X-12-8-S1.pdf [file 1475-925X-12-8-S1.pdf]

## Appendix: Model Equations

### Calcium Input

The model input is a time-varying intracellular calcium concentration, described by the following equation.

|                                                                                                                                                                                                                                                                                                                 |       |
|-----------------------------------------------------------------------------------------------------------------------------------------------------------------------------------------------------------------------------------------------------------------------------------------------------------------|-------|
| $[\text{Ca}^{2+}](t) = \begin{cases} \frac{\text{Ca}_{max}}{2} \left(1 - \cos\left(\frac{\pi t}{T_1}\right)\right) & \text{if } 0 \leq t < T_1 \\ \frac{\text{Ca}_{max}}{2} \left(1 + \cos\left(\frac{\pi(t - T_1)}{T_2 - T_1}\right)\right) & \text{if } T_1 \leq t < T_2 \\ 0 & \text{otherwise} \end{cases}$ | (A.1) |
|-----------------------------------------------------------------------------------------------------------------------------------------------------------------------------------------------------------------------------------------------------------------------------------------------------------------|-------|

### Cardiac Muscle Model

Passive force generated by stretching the muscle unit is given by:

|                       |       |
|-----------------------|-------|
| $F_p = K(L - L_0)^5,$ | (A.2) |
|-----------------------|-------|

while active muscle force depends on two main factors: elongation of cross-bridges and concentration of attached cross-bridges. Elongation of cross-bridges is equal to  $L - X$ , where the return to equilibrium is governed by:

|                                   |       |
|-----------------------------------|-------|
| $\frac{dX}{dt} = B(L - X - h_c).$ | (A.3) |
|-----------------------------------|-------|

Concentration of attached cross-bridges is linked to a chemical reaction network involving four species whose concentrations can be computed by:

|                                                                                                                                                                                                                               |       |
|-------------------------------------------------------------------------------------------------------------------------------------------------------------------------------------------------------------------------------|-------|
| $\frac{d[\text{TCa}]}{dt} = Q_b - Q_a$                                                                                                                                                                                        | (A.4) |
| $\frac{d[\text{TCa}^*]}{dt} = Q_a - Q_r - Q_{d1}$                                                                                                                                                                             |       |
| $\frac{d[\text{T}^*]}{dt} = Q_r - Q_d - Q_{d2}$                                                                                                                                                                               |       |
| $Q_a = Y_2 \cdot [\text{TCa}]_{eff} - Z_2 \cdot [\text{TCa}^*]$ $Q_b = Y_1 \cdot [\text{Ca}^{2+}] \cdot [\text{T}] - Z_1 \cdot [\text{TCa}]$ $Q_r = Y_3 \cdot [\text{TCa}^*] - Z_3 \cdot [\text{T}^*] \cdot [\text{Ca}^{2+}]$ | (A.5) |

|                                                                                                                                                       |       |
|-------------------------------------------------------------------------------------------------------------------------------------------------------|-------|
| $Q_d = Y_4 \cdot [T^*]$ $Q_{d1} = Y_d \cdot \left(\frac{dX}{dt}\right)^2 \cdot [TCa^*]$ $Q_{d2} = Y_d \cdot \left(\frac{dX}{dt}\right)^2 \cdot [T^*]$ |       |
| $[TCa]_{eff} = [TCa]e^{-R(L-L_a)^2}$ $[T] = T_t - [TCa^*] - [TCa] - [T^*].$                                                                           | (A.6) |

Finally, force generated by cross-bridges is related to concentration of attached cross-bridges and elongation of cross-bridges by:

|                                    |       |
|------------------------------------|-------|
| $F_b = A([TCa^*] + [T^*])(L - X).$ | (A.7) |
|------------------------------------|-------|

Total force generated by the muscle unit is thus:

|                  |       |
|------------------|-------|
| $F = F_b + F_p.$ | (A.8) |
|------------------|-------|

A series elastic element is added to the muscle unit, whose force  $F_s$  and length  $L_s$  are given by:

|                                   |       |
|-----------------------------------|-------|
| $F_s = \alpha(e^{\beta L_s} - 1)$ | (A.9) |
|-----------------------------------|-------|

|           |        |
|-----------|--------|
| $F = F_s$ | (A.10) |
|-----------|--------|

|                  |        |
|------------------|--------|
| $L_t = L + L_s.$ | (A.11) |
|------------------|--------|

### Ventricular Model

The spherical ventricle model consists of an arrangement of  $N_c$  half-sarcomeres on the circumference of a sphere. The number  $N_c$  of half-sarcomeres is given by:

|                                                    |        |
|----------------------------------------------------|--------|
| $V_{mw} = K_v L_t^3$ $K_v = \frac{N_c^3}{6\pi^2}.$ | (A.12) |
|----------------------------------------------------|--------|

The pressure inside the spherical ventricle can be obtained by the following relationship:

|                                                  |        |
|--------------------------------------------------|--------|
| $P_{lv} = 5 \frac{F}{L_r} \frac{V_w}{K_v L_t^2}$ | (A.13) |
|--------------------------------------------------|--------|

To derive the total length of the muscle unit from the ventricle volume  $V_{lv}$ , the following equation is used:

|                                              |        |
|----------------------------------------------|--------|
| $L_t = \sqrt[3]{\frac{V_w f + V_{lv}}{K_v}}$ | (A.14) |
|----------------------------------------------|--------|

### Cardiovascular system model

Pressure in the right ventricle is given by:

|                               |        |
|-------------------------------|--------|
| $P_{rv} = e(t) E_{rv} V_{rv}$ | (A.15) |
|-------------------------------|--------|

with

|                                             |        |
|---------------------------------------------|--------|
| $e(t) = \sum_{i=1}^3 A_i e^{-B_i(t-C_i)^2}$ | (A.16) |
|---------------------------------------------|--------|

The other elastic chambers are passive, hence

|                          |        |
|--------------------------|--------|
| $P_{ao} = E_{ao} V_{ao}$ | (A.17) |
|--------------------------|--------|

|                          |        |
|--------------------------|--------|
| $P_{vc} = E_{vc} V_{vc}$ | (A.18) |
|--------------------------|--------|

|                          |        |
|--------------------------|--------|
| $P_{pa} = E_{pa} V_{pa}$ | (A.19) |
|--------------------------|--------|

|                          |        |
|--------------------------|--------|
| $P_{pu} = E_{pu} V_{pu}$ | (A.20) |
|--------------------------|--------|

Flows between chambers are computed by Poiseuille's law:

|                                                            |        |
|------------------------------------------------------------|--------|
| $Q_{mt} = r \left( \frac{P_{pu} - P_{lv}}{R_{mt}} \right)$ | (A.21) |
|------------------------------------------------------------|--------|

|                                                            |        |
|------------------------------------------------------------|--------|
| $Q_{av} = r \left( \frac{P_{lv} - P_{ao}}{R_{av}} \right)$ | (A.22) |
|------------------------------------------------------------|--------|

|                                             |        |
|---------------------------------------------|--------|
| $Q_{sys} = \frac{P_{ao} - P_{vc}}{R_{sys}}$ | (A.23) |
|---------------------------------------------|--------|

|                                                            |        |
|------------------------------------------------------------|--------|
| $Q_{tc} = r \left( \frac{P_{vc} - P_{rv}}{R_{tc}} \right)$ | (A.24) |
|------------------------------------------------------------|--------|

|                                                         |        |
|---------------------------------------------------------|--------|
| $Q_{pv} = r\left(\frac{P_{rv} - P_{pa}}{R_{ap}}\right)$ | (A.25) |
| $Q_{pul} = \frac{P_{pa} - P_{pu}}{R_{pul}}$             | (A.26) |

where  $r$  denotes the ramp function, defined as

|                                                                 |        |
|-----------------------------------------------------------------|--------|
| $r(x) = \begin{cases} 0, & x < 0 \\ x, & x \geq 0. \end{cases}$ | (A.27) |
|-----------------------------------------------------------------|--------|

The volume change in the six chambers can be derived from the continuity equation:

|                                         |        |
|-----------------------------------------|--------|
| $\frac{dV_{lv}}{dt} = Q_{mt} - Q_{av}$  | (A.28) |
| $\frac{dV_{ao}}{dt} = Q_{av} - Q_{sys}$ | (A.29) |
| $\frac{dV_{vc}}{dt} = Q_{sys} - Q_{tc}$ | (A.30) |
| $\frac{dV_{rv}}{dt} = Q_{tc} - Q_{pv}$  | (A.31) |
| $\frac{dV_{pa}}{dt} = Q_{pv} - Q_{pul}$ | (A.32) |
| $\frac{dV_{pa}}{dt} = Q_{pul} - Q_{mt}$ | (A.33) |
